# Supplementary material for: Cocrystallization of coordinative and inorganic lanthanide centers showing dual emission via linked or unlinked antenna
Source: Royal Society of Chemistry journal article supplement (doi:10.1039/c2ce06605j), 2012-01-01
Supplement: c2ce06605j.pdf [file c2ce06605j.pdf]

**Supporting file for paper “Cocrystallization of Coordinative and Inorganic Lanthanide Centers Showing Dual Emission via Linked or Unlinked Antenna”.**

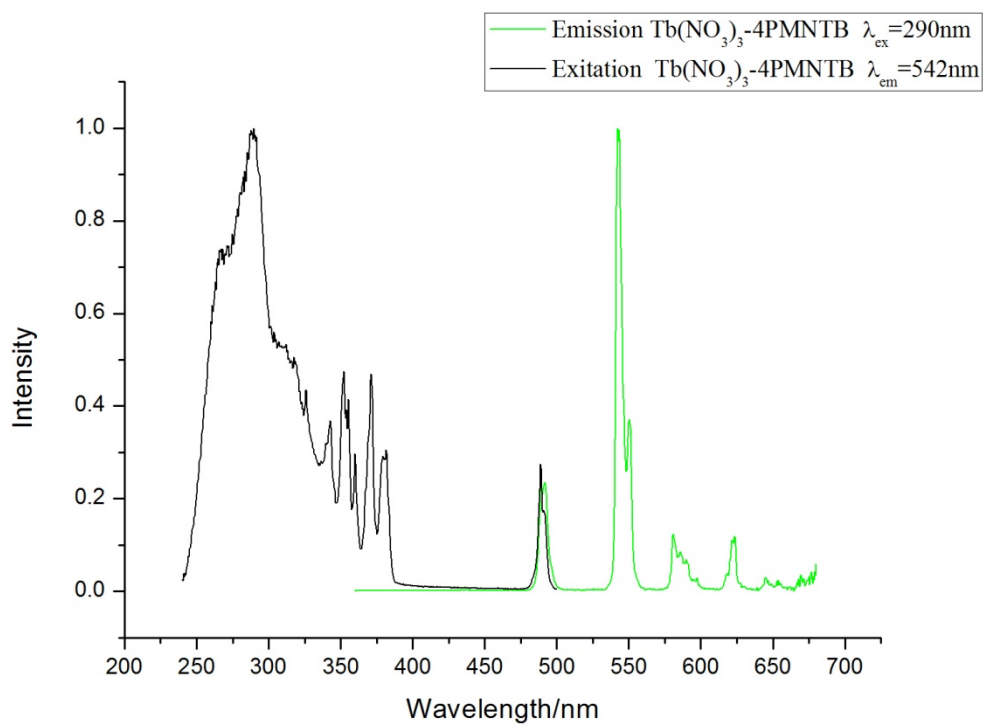

Figure S1. The excitation and emission spectra of Tb cocrystalline complex **6**.

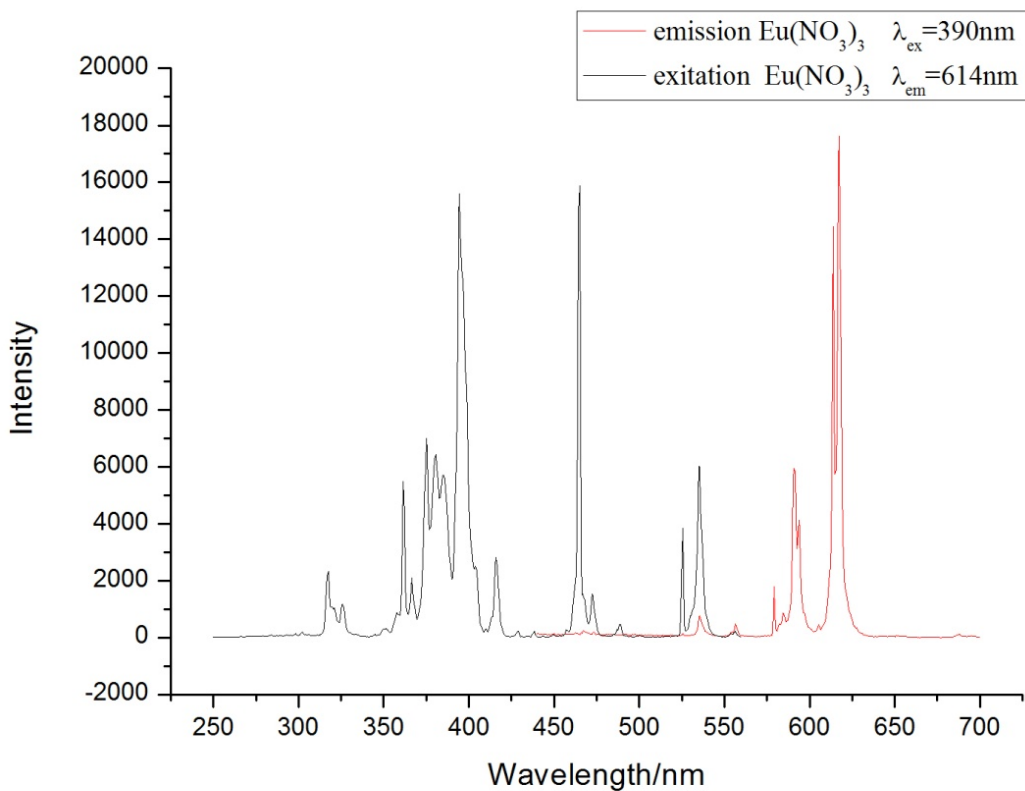

Figure S2. The excitation (a) and emission (b) spectra of pure  $\text{Eu}(\text{NO}_3)_3$ .

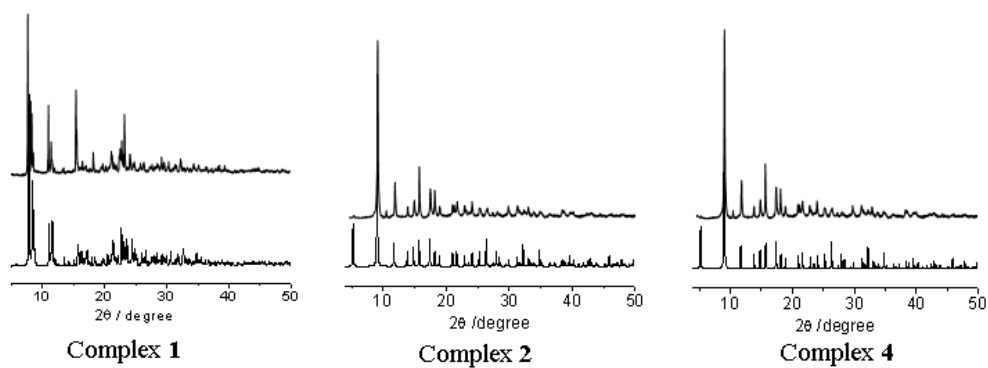

Figure S3 PXRD of the complexes.

Table S1. Details of the lifetimes in the mechanically mixed complex **3**- $\text{Eu}(\text{NO}_3)_3$  system.

|          | Lifetime/ $\mu\text{s}$ | Rel% |
|----------|-------------------------|------|
| $\tau_1$ | 167                     | 13   |
| $\tau_2$ | 358                     | 30   |
| $\tau_3$ | 1133                    | 57   |

The mass ratio of complex **3** to  $\text{Eu}(\text{NO}_3)_3$  is 5: 3. The emission is excited at 390 nm, and the monitored emission wavelength is 614 nm.

Table S2. Selected bond lengths ( $\text{\AA}$ ) and angles ( $^\circ$ ) for the complexes.

| <b>1</b>           |           |                    |           |                    |           |
|--------------------|-----------|--------------------|-----------|--------------------|-----------|
| Eu(1)-O(1)         | 2.256(2)  | Eu(1)-O(15)        | 2.260(2)  | Eu(1)-O(8)         | 2.277(2)  |
| Eu(1)-N(8)         | 2.494(3)  | Eu(1)-N(5)         | 2.517(3)  | Eu(1)-N(2)         | 2.520(2)  |
| Eu(1)-N(1)         | 2.714(3)  | O(1)-Eu(1)-O(15)   | 98.43(8)  | O(1)-Eu(1)-O(8)    | 97.55(8)  |
| O(15)-Eu(1)-O(8)   | 96.87(8)  | O(1)-Eu(1)-N(8)    | 174.89(9) | O(15)-Eu(1)-N(8)   | 82.86(9)  |
| O(8)-Eu(1)-N(8)    | 77.37(8)  | O(1)-Eu(1)-N(5)    | 82.48(8)  | O(15)-Eu(1)-N(5)   | 76.99(8)  |
| O(8)-Eu(1)-N(5)    | 173.77(8) | N(8)-Eu(1)-N(5)    | 102.63(8) | O(1)-Eu(1)-N(2)    | 76.46(8)  |
| O(15)-Eu(1)-N(2)   | 173.99(9) | O(8)-Eu(1)-N(2)    | 87.02(8)  | N(8)-Eu(1)-N(2)    | 102.51(8) |
| N(5)-Eu(1)-N(2)    | 99.01(8)  | O(1)-Eu(1)-N(1)    | 119.74(8) | O(15)-Eu(1)-N(1)   | 117.78(8) |
| O(8)-Eu(1)-N(1)    | 121.47(8) | N(8)-Eu(1)-N(1)    | 63.41(8)  | N(5)-Eu(1)-N(1)    | 63.26(8)  |
| N(2)-Eu(1)-N(1)    | 63.29(8)  |                    |           |                    |           |
| <b>2</b>           |           |                    |           |                    |           |
| Tb(1)-O(1)         | 2.256(2)  | Tb(1)-O(15)        | 2.260(2)  | Tb (1)-O(8)        | 2.277(2)  |
| Tb (1)-N(8)        | 2.494(3)  | Tb (1)-N(5)        | 2.517(3)  | Tb (1)-N(2)        | 2.520(2)  |
| Tb (1)-N(1)        | 2.714(3)  | O(1)- Tb (1)-O(15) | 98.43(8)  | O(1)- Tb (1)-O(8)  | 97.55(8)  |
| O(15)- Tb (1)-O(8) | 96.87(8)  | O(1)- Tb (1)-N(8)  | 174.89(9) | O(15)- Tb (1)-N(8) | 82.86(9)  |
| O(8)- Tb (1)-N(8)  | 77.37(8)  | O(1)- Tb (1)-N(5)  | 82.48(8)  | O(15)- Tb (1)-N(5) | 76.99(8)  |
| O(8)- Tb (1)-N(5)  | 173.77(8) | N(8)- Tb (1)-N(5)  | 102.63(8) | O(1)- Tb (1)-N(2)  | 76.46(8)  |
| O(15)- Tb (1)-N(2) | 173.99(9) | O(8)- Tb (1)-N(2)  | 87.02(8)  | N(8)- Tb (1)-N(2)  | 102.51(8) |
| N(5)- Tb (1)-N(2)  | 99.01(8)  | O(1)- Tb (1)-N(1)  | 119.74(8) | O(15)- Tb (1)-N(1) | 117.78(8) |
| O(8)- Tb (1)-N(1)  | 121.47(8) | N(8)- Tb (1)-N(1)  | 63.41(8)  | N(5)- Tb (1)-N(1)  | 63.26(8)  |
| N(2)- Tb (1)-N(1)  | 63.29(8)  |                    |           |                    |           |
| <b>4</b>           |           |                    |           |                    |           |
| Tb(1)-O(1)#1       | 2.480(2)  | Tb(1)-O(1)         | 2.480(2)  | Tb(1)-O(1)#2       | 2.480(2)  |
| Tb(1)-N(2)#1       | 2.511(6)  | Tb(1)-N(2)#2       | 2.511(6)  | Tb(1)-N(2)         | 2.511(6)  |
| Tb(1)-O(2)#1       | 2.548(2)  | Tb(1)-O(2)         | 2.548(2)  | Tb(1)-O(2)#2       | 2.548(2)  |
| Tb(1)-N(1)         | 2.698(12) | Tb(1)-N(5)#1       | 2.932(2)  | Tb(1)-N(5)         | 2.932(2)  |

|                     |            |                     |            |                     |            |
|---------------------|------------|---------------------|------------|---------------------|------------|
| Tb(2)-O(7)#5        | 2.348(3)   | Tb(2)-O(7)          | 2.3480     | Tb(2)-O(7)#4        | 2.348(3)   |
| Tb(2)-O(4)#4        | 2.564(4)   | Tb(2)-O(5)#4        | 2.502(3)   | Tb(2)-O(5)#5        | 2.502(3)   |
| O(1)#1-Tb(1)-O(1)#2 | 70.98(8)   | Tb(2)-O(4)#5        | 2.564(4)   | Tb(2)-O(4)          | 2.563(9)   |
| O(1)-Tb(1)-N(2)#1   | 116.17(16) | Tb(2)-O(8)          | 2.643(4)   | O(1)#1-Tb(1)-O(1)   | 70.98(8)   |
| O(1)-Tb(1)-N(2)#2   | 141.02(16) | O(1)-Tb(1)-O(1)#2   | 70.98(8)   | O(1)#1-Tb(1)-N(2)#1 | 75.67(16)  |
| O(1)#1-Tb(1)-N(2)   | 141.02(16) | O(1)#2-Tb(1)-N(2)#1 | 141.02(16) | O(1)#1-Tb(1)-N(2)#2 | 116.17(16) |
| N(2)#1-Tb(1)-N(2)   | 102.39(18) | O(1)#2-Tb(1)-N(2)#2 | 75.67(16)  | N(2)#1-Tb(1)-N(2)#2 | 102.39(18) |
| O(1)-Tb(1)-O(2)#1   | 118.35(8)  | O(1)-Tb(1)-N(2)     | 75.67(16)  | O(1)#2-Tb(1)-N(2)   | 116.17(16) |
| N(2)#2-Tb(1)-O(2)#1 | 68.68(16)  | N(2)#2-Tb(1)-N(2)   | 102.39(18) | N(2)#1-Tb(1)-O(2)#1 | 70.03(16)  |
| N(2)#2-Tb(1)-O(2)   | 165.77(15) | O(1)#2-Tb(1)-O(2)#1 | 73.33(5)   | O(1)#1-Tb(1)-O(2)   | 73.33(5)   |
| O(1)#1-Tb(1)-O(2)#2 | 118.34(8)  | N(2)-Tb(1)-O(2)#1   | 165.77(15) | N(2)#1-Tb(1)-O(2)   | 68.68(16)  |
| N(2)#1-Tb(1)-O(2)#2 | 165.77(15) | O(1)#2-Tb(1)-O(2)   | 118.34(8)  | N(2)-Tb(1)-O(2)#2   | 68.68(16)  |
| O(1)-Tb(1)-N(1)     | 137.90(5)  | N(2)-Tb(1)-O(2)     | 70.03(16)  | O(1)#1-Tb(1)-N(1)   | 137.90(5)  |
| N(2)#2-Tb(1)-N(1)   | 64.14(15)  | O(1)-Tb(1)-O(2)#2   | 73.33(5)   | N(2)#1-Tb(1)-N(1)   | 64.14(15)  |
| O(2)-Tb(1)-N(1)     | 101.65(4)  | N(2)#2-Tb(1)-O(2)#2 | 70.03(16)  | O(2)#1-Tb(1)-N(1)   | 101.65(4)  |
| O(1)-Tb(1)-N(5)#1   | 94.03(7)   | O(1)#2-Tb(1)-N(1)   | 137.90(5)  | N(2)#1-Tb(1)-N(5)#1 | 70.94(16)  |
| N(2)#2-Tb(1)-N(5)#1 | 93.25(15)  | N(2)-Tb(1)-N(1)     | 64.14(15)  | O(2)#2-Tb(1)-N(5)#1 | 120.52(5)  |
| N(1)-Tb(1)-N(5)#1   | 121.91(4)  | O(2)#2-Tb(1)-N(1)   | 101.65(4)  | O(1)#1-Tb(1)-N(5)   | 70.33(6)   |
| N(2)#1-Tb(1)-N(5)   | 93.25(15)  | O(1)#2-Tb(1)-N(5)#1 | 70.33(6)   | N(2)-Tb(1)-N(5)#1   | 164.08(16) |
| N(2)#2-Tb(1)-N(5)   | 164.08(16) | N(2)-Tb(1)-N(5)     | 70.94(16)  | O(2)#1-Tb(1)-N(5)   | 120.52(5)  |
| N(1)-Tb(1)-N(5)     | 121.91(4)  | N(5)#1-Tb(1)-N(5)   | 94.63(5)   | O(8)#3-Tb(2)-O(7)   | 124.33(16) |
| O(8)#3-Tb(2)-O(7)#4 | 124.33(19) | O(7)-Tb(2)-O(7)#4   | 91.31(8)   | O(8)#3-Tb(2)-O(7)#5 | 124.33(7)  |
| O(7)-Tb(2)-O(7)#5   | 91.31(8)   | O(7)-Tb(2)-O(5)#4   | 141.95(9)  | O(7)#4-Tb(2)-O(5)#4 | 124.68(16) |
| O(7)#5-Tb(2)-O(5)#4 | 77.35(9)   | O(8)#3-Tb(2)-O(5)#5 | 47.75(11)  | O(7)-Tb(2)-O(5)#5   | 77.35(6)   |
| O(7)#4-Tb(2)-O(5)#5 | 141.95(17) | O(7)#5-Tb(2)-O(5)#5 | 124.68(16) | O(8)#3-Tb(2)-O(5)   | 47.75(11)  |
| O(7)#4-Tb(2)-O(5)   | 77.35(6)   | O(7)#5-Tb(2)-O(5)   | 141.95(9)  | O(5)#4-Tb(2)-O(5)   | 79.74(8)   |
| O(5)#5-Tb(2)-O(5)   | 79.74(7)   | O(8)#3-Tb(2)-O(4)#5 | 78.69(13)  | O(7)-Tb(2)-O(4)#5   | 73.74(7)   |
| O(7)#4-Tb(2)-O(4)#5 | 156.96(6)  | O(7)#5-Tb(2)-O(4)#5 | 72.04(10)  | O(5)#5-Tb(2)-O(4)#5 | 52.73(7)   |
| O(7)#4-Tb(2)-O(4)   | 73.74(9)   | O(7)#5-Tb(2)-O(4)   | 156.96(5)  | O(5)#4-Tb(2)-O(4)   | 125.53(6)  |

|                     |            |                     |            |                     |            |
|---------------------|------------|---------------------|------------|---------------------|------------|
| O(5)#5-Tb(2)-O(4)   | 68.21(9)   | O(4)#5-Tb(2)-O(4)   | 116.25(8)  | O(8)#3-Tb(2)-O(4)#4 | 78.69(15)  |
| O(7)#4-Tb(2)-O(4)#4 | 72.04(11)  | O(5)#4-Tb(2)-O(4)#4 | 52.73(7)   | O(5)-Tb(2)-O(4)#4   | 68.21(7)   |
| O(4)#5-Tb(2)-O(4)#4 | 116.25(7)  | O(4)-Tb(2)-O(4)#4   | 116.25(9)  | O(8)#3-Tb(2)-O(8)   | 180.0(3)   |
| O(7)#4-Tb(2)-O(8)   | 55.67(6)   | O(7)#5-Tb(2)-O(8)   | 55.67(5)   | O(5)#4-Tb(2)-O(8)   | 132.25(6)  |
| O(5)#5-Tb(2)-O(8)   | 132.25(6)  |                     |            |                     |            |
| <b>5</b>            |            |                     |            |                     |            |
| Eu(1)-O(1)#1        | 2.498(6)   | Eu(1)-O(1)          | 2.498(6)   | Eu(1)-O(1)#2        | 2.498(6)   |
| Eu(1)-O(2)          | 2.512(6)   | Eu(1)-O(2)#2        | 2.512(6)   | Eu(1)-O(2)#1        | 2.512(6)   |
| Eu(1)-N(2)#1        | 2.586(7)   | Eu(1)-N(2)          | 2.586(7)   | Eu(1)-N(2)#2        | 2.586(7)   |
| Eu(1)-N(1)          | 2.763(11)  | Eu(1)-N(5)          | 2.936(8)   | Eu(1)-N(5)#1        | 2.936(8)   |
| Eu(2)-O(7)          | 2.343(12)  | Eu(2)-O(7)#3        | 2.343(12)  | Eu(2)-O(7)#4        | 2.343(12)  |
| Eu(2)-O(5)          | 2.475(8)   | Eu(2)-O(5)#4        | 2.475(8)   | Eu(2)-O(5)#3        | 2.475(8)   |
| Eu(2)-O(4)          | 2.507(9)   | Eu(2)-O(4)#4        | 2.507(9)   | Eu(2)-O(4)#3        | 2.507(9)   |
| Eu(2)-N(6)          | 2.882(13)  | Eu(2)-N(6)#4        | 2.882(13)  | Eu(2)-N(6)#3        | 2.882(13)  |
| O(1)#1-Eu(1)-O(1)   | 70.7(3)    | O(1)#1-Eu(1)-O(1)#2 | 70.7(3)    | O(1)-Eu(1)-O(1)#2   | 70.7(3)    |
| O(1)#1-Eu(1)-O(2)   | 72.5(2)    | O(1)-Eu(1)-O(2)     | 50.8(2)    | O(1)#2-Eu(1)-O(2)   | 118.2(2)   |
| O(1)#1-Eu(1)-O(2)#2 | 118.2(2)   | O(1)-Eu(1)-O(2)#2   | 72.5(2)    | O(1)#2-Eu(1)-O(2)#2 | 50.8(2)    |
| O(2)-Eu(1)-O(2)#2   | 115.85(10) | O(1)#1-Eu(1)-O(2)#1 | 50.8(2)    | O(1)-Eu(1)-O(2)#1   | 118.2(2)   |
| O(1)#2-Eu(1)-O(2)#1 | 72.5(2)    | O(2)-Eu(1)-O(2)#1   | 115.85(10) | O(2)#2-Eu(1)-O(2)#1 | 115.85(10) |
| O(1)#1-Eu(1)-N(2)#1 | 142.1(2)   | O(1)-Eu(1)-N(2)#1   | 77.1(2)    | O(1)#2-Eu(1)-N(2)#1 | 116.8(2)   |
| O(2)-Eu(1)-N(2)#1   | 71.8(2)    | O(2)#2-Eu(1)-N(2)#1 | 68.2(2)    | O(2)#1-Eu(1)-N(2)#1 | 164.7(2)   |
| O(1)#1-Eu(1)-N(2)   | 116.8(2)   | O(1)-Eu(1)-N(2)     | 142.1(2)   | O(1)#2-Eu(1)-N(2)   | 77.1(2)    |
| O(2)-Eu(1)-N(2)     | 164.7(2)   | O(2)#2-Eu(1)-N(2)   | 71.8(2)    | O(2)#1-Eu(1)-N(2)   | 68.2(2)    |
| N(2)#1-Eu(1)-N(2)   | 100.86(19) | O(1)#1-Eu(1)-N(2)#2 | 77.1(2)    | O(1)-Eu(1)-N(2)#2   | 116.8(2)   |
| O(1)#2-Eu(1)-N(2)#2 | 142.1(2)   | O(2)-Eu(1)-N(2)#2   | 68.2(2)    | O(2)#2-Eu(1)-N(2)#2 | 164.7(2)   |
| O(2)#1-Eu(1)-N(2)#2 | 71.8(2)    | N(2)#1-Eu(1)-N(2)#2 | 100.86(19) | N(2)-Eu(1)-N(2)#2   | 100.86(19) |
| O(1)#1-Eu(1)-N(1)   | 138.06(17) | O(1)-Eu(1)-N(1)     | 138.06(17) | O(1)#2-Eu(1)-N(1)   | 138.06(17) |
| O(2)-Eu(1)-N(1)     | 101.91(15) | O(2)#2-Eu(1)-N(1)   | 101.91(15) | O(2)#1-Eu(1)-N(1)   | 101.91(15) |
| N(2)#1-Eu(1)-N(1)   | 62.89(15)  | N(2)-Eu(1)-N(1)     | 62.89(15)  | N(2)#2-Eu(1)-N(1)   | 62.89(15)  |

|                     |            |                     |            |                     |            |
|---------------------|------------|---------------------|------------|---------------------|------------|
| O(1)#1-Eu(1)-N(5)   | 69.0(2)    | O(1)-Eu(1)-N(5)     | 25.4(2)    | O(1)#2-Eu(1)-N(5)   | 94.3(3)    |
| O(2)-Eu(1)-N(5)     | 25.5(3)    | O(2)#2-Eu(1)-N(5)   | 94.5(2)    | O(2)#1-Eu(1)-N(5)   | 119.7(2)   |
| N(2)#1-Eu(1)-N(5)   | 73.3(2)    | N(2)-Eu(1)-N(5)     | 166.3(3)   | N(2)#2-Eu(1)-N(5)   | 92.4(3)    |
| N(1)-Eu(1)-N(5)     | 122.13(18) | O(1)#1-Eu(1)-N(5)#1 | 25.4(2)    | O(1)-Eu(1)-N(5)#1   | 94.3(3)    |
| O(1)#2-Eu(1)-N(5)#1 | 69.0(2)    | O(2)-Eu(1)-N(5)#1   | 94.5(2)    | O(2)#2-Eu(1)-N(5)#1 | 119.7(2)   |
| O(2)#1-Eu(1)-N(5)#1 | 25.5(3)    | N(2)#1-Eu(1)-N(5)#1 | 166.3(3)   | N(2)-Eu(1)-N(5)#1   | 92.4(3)    |
| N(2)#2-Eu(1)-N(5)#1 | 73.3(2)    | N(1)-Eu(1)-N(5)#1   | 122.13(18) | N(5)-Eu(1)-N(5)#1   | 94.3(2)    |
| O(7)-Eu(2)-O(7)#3   | 94.1(5)    | O(7)-Eu(2)-O(7)#4   | 94.1(5)    | O(7)#3-Eu(2)-O(7)#4 | 94.1(5)    |
| O(7)-Eu(2)-O(5)     | 121.2(4)   | O(7)#3-Eu(2)-O(5)   | 82.4(4)    | O(7)#4-Eu(2)-O(5)   | 144.7(4)   |
| O(7)-Eu(2)-O(5)#4   | 82.4(4)    | O(7)#3-Eu(2)-O(5)#4 | 144.7(4)   | O(7)#4-Eu(2)-O(5)#4 | 121.2(4)   |
| O(5)-Eu(2)-O(5)#4   | 70.1(3)    | O(7)-Eu(2)-O(5)#3   | 144.7(4)   | O(7)#3-Eu(2)-O(5)#3 | 121.2(4)   |
| O(7)#4-Eu(2)-O(5)#3 | 82.4(4)    | O(5)-Eu(2)-O(5)#3   | 70.1(3)    | O(5)#4-Eu(2)-O(5)#3 | 70.1(3)    |
| O(7)-Eu(2)-O(4)     | 71.0(4)    | O(7)#3-Eu(2)-O(4)   | 73.9(4)    | O(7)#4-Eu(2)-O(4)   | 159.6(5)   |
| O(5)-Eu(2)-O(4)     | 51.5(3)    | O(5)#4-Eu(2)-O(4)   | 71.7(3)    | O(5)#3-Eu(2)-O(4)   | 117.8(3)   |
| O(7)-Eu(2)-O(4)#4   | 73.9(4)    | O(7)#3-Eu(2)-O(4)#4 | 159.6(5)   | O(7)#4-Eu(2)-O(4)#4 | 71.0(4)    |
| O(5)-Eu(2)-O(4)#4   | 117.8(3)   | O(5)#4-Eu(2)-O(4)#4 | 51.5(3)    | O(5)#3-Eu(2)-O(4)#4 | 71.7(3)    |
| O(4)-Eu(2)-O(4)#4   | 115.76(15) | O(7)-Eu(2)-O(4)#3   | 159.6(5)   | O(7)#3-Eu(2)-O(4)#3 | 71.0(4)    |
| O(7)#4-Eu(2)-O(4)#3 | 73.9(4)    | O(5)-Eu(2)-O(4)#3   | 71.7(3)    | O(5)#4-Eu(2)-O(4)#3 | 117.8(3)   |
| O(5)#3-Eu(2)-O(4)#3 | 51.5(3)    | O(4)-Eu(2)-O(4)#3   | 115.76(15) | O(4)#4-Eu(2)-O(4)#3 | 115.76(15) |
| O(7)-Eu(2)-N(6)     | 95.1(4)    | O(7)#3-Eu(2)-N(6)   | 77.9(4)    | O(7)#4-Eu(2)-N(6)   | 168.3(4)   |
| O(5)-Eu(2)-N(6)     | 26.6(3)    | O(5)#4-Eu(2)-N(6)   | 67.5(3)    | O(5)#3-Eu(2)-N(6)   | 94.3(3)    |
| O(4)-Eu(2)-N(6)     | 25.0(3)    | O(4)#4-Eu(2)-N(6)   | 118.7(3)   | O(4)#3-Eu(2)-N(6)   | 95.2(3)    |
| O(7)-Eu(2)-N(6)#4   | 77.9(4)    | O(7)#3-Eu(2)-N(6)#4 | 168.3(4)   | O(7)#4-Eu(2)-N(6)#4 | 95.1(4)    |
| O(5)-Eu(2)-N(6)#4   | 94.3(3)    | O(5)#4-Eu(2)-N(6)#4 | 26.6(3)    | O(5)#3-Eu(2)-N(6)#4 | 67.5(3)    |
| O(4)-Eu(2)-N(6)#4   | 95.2(3)    | O(4)#4-Eu(2)-N(6)#4 | 25.0(3)    | O(4)#3-Eu(2)-N(6)#4 | 118.7(3)   |
| N(6)-Eu(2)-N(6)#4   | 94.0(3)    | O(7)-Eu(2)-N(6)#3   | 168.3(4)   | O(7)#3-Eu(2)-N(6)#3 | 95.1(4)    |
| O(7)#4-Eu(2)-N(6)#3 | 77.9(4)    | O(5)-Eu(2)-N(6)#3   | 67.5(3)    | O(5)#4-Eu(2)-N(6)#3 | 94.3(3)    |
| O(5)#3-Eu(2)-N(6)#3 | 26.6(3)    | O(4)-Eu(2)-N(6)#3   | 118.7(3)   | O(4)#4-Eu(2)-N(6)#3 | 95.2(3)    |
| O(4)#3-Eu(2)-N(6)#3 | 25.0(3)    | N(6)-Eu(2)-N(6)#3   | 94.0(3)    | N(6)#4-Eu(2)-N(6)#3 | 94.0(3)    |

|                     |            |                     |            |                     |            |
|---------------------|------------|---------------------|------------|---------------------|------------|
| <b>6</b>            |            |                     |            |                     |            |
| Tb(1)-O(2)#1        | 2.467(6)   | Tb(1)-O(2)#2        | 2.467(6)   | Tb(1)-O(2)          | 2.467(6)   |
| Tb(1)-O(1)          | 2.501(6)   | Tb(1)-O(1)#1        | 2.501(6)   | Tb(1)-O(1)#2        | 2.501(6)   |
| Tb(1)-N(2)          | 2.567(6)   | Tb(1)-N(2)#1        | 2.567(6)   | Tb(1)-N(2)#2        | 2.567(6)   |
| Tb(1)-N(1)          | 2.739(11)  | Tb(1)-N(5)#1        | 2.903(8)   | Tb(1)-N(5)#2        | 2.903(8)   |
| Tb(2)-O(1W)         | 2.321(11)  | Tb(2)-O(1W)#3       | 2.321(11)  | Tb(2)-O(1W)#4       | 2.321(11)  |
| Tb(2)-O(4)#4        | 2.454(7)   | Tb(2)-O(4)          | 2.455(7)   | Tb(2)-O(4)#3        | 2.454(7)   |
| Tb(2)-O(5)          | 2.488(9)   | Tb(2)-O(5)#4        | 2.488(9)   | Tb(2)-O(5)#3        | 2.488(9)   |
| Tb(2)-N(6)          | 2.828(11)  | Tb(2)-N(6)#4        | 2.828(11)  | Tb(2)-N(6)#3        | 2.828(11)  |
| O(2)#1-Tb(1)-O(2)#2 | 70.3(2)    | O(2)#1-Tb(1)-O(2)   | 70.3(2)    | O(2)#2-Tb(1)-O(2)   | 70.3(2)    |
| O(2)#1-Tb(1)-O(1)   | 72.6(2)    | O(2)#2-Tb(1)-O(1)   | 118.6(2)   | O(2)-Tb(1)-O(1)     | 51.7(2)    |
| O(2)#1-Tb(1)-O(1)#1 | 51.7(2)    | O(2)#2-Tb(1)-O(1)#1 | 72.6(2)    | O(2)-Tb(1)-O(1)#1   | 118.6(2)   |
| O(1)-Tb(1)-O(1)#1   | 116.21(9)  | O(2)#1-Tb(1)-O(1)#2 | 118.6(2)   | O(2)#2-Tb(1)-O(1)#2 | 51.7(2)    |
| O(2)-Tb(1)-O(1)#2   | 72.6(2)    | O(1)-Tb(1)-O(1)#2   | 116.21(9)  | O(1)#1-Tb(1)-O(1)#2 | 116.21(9)  |
| O(2)#1-Tb(1)-N(2)   | 141.6(2)   | O(2)#2-Tb(1)-N(2)   | 116.6(2)   | O(2)-Tb(1)-N(2)     | 76.8(2)    |
| O(1)-Tb(1)-N(2)     | 71.6(2)    | O(1)#1-Tb(1)-N(2)   | 164.6(2)   | O(1)#2-Tb(1)-N(2)   | 67.4(2)    |
| O(2)#1-Tb(1)-N(2)#1 | 76.8(2)    | O(2)#2-Tb(1)-N(2)#1 | 141.6(2)   | O(2)-Tb(1)-N(2)#1   | 116.6(2)   |
| O(1)-Tb(1)-N(2)#1   | 67.4(2)    | O(1)#1-Tb(1)-N(2)#1 | 71.6(2)    | O(1)#2-Tb(1)-N(2)#1 | 164.6(2)   |
| N(2)-Tb(1)-N(2)#1   | 101.51(18) | O(2)#1-Tb(1)-N(2)#2 | 116.6(2)   | O(2)#2-Tb(1)-N(2)#2 | 76.8(2)    |
| O(2)-Tb(1)-N(2)#2   | 141.6(2)   | O(1)-Tb(1)-N(2)#2   | 164.6(2)   | O(1)#1-Tb(1)-N(2)#2 | 67.4(2)    |
| O(1)#2-Tb(1)-N(2)#2 | 71.6(2)    | N(2)-Tb(1)-N(2)#2   | 101.51(18) | N(2)#1-Tb(1)-N(2)#2 | 101.51(18) |
| O(2)#1-Tb(1)-N(1)   | 138.30(15) | O(2)#2-Tb(1)-N(1)   | 138.30(15) | O(2)-Tb(1)-N(1)     | 138.30(15) |
| O(1)-Tb(1)-N(1)     | 101.37(14) | O(1)#1-Tb(1)-N(1)   | 101.37(14) | O(1)#2-Tb(1)-N(1)   | 101.37(14) |
| N(2)-Tb(1)-N(1)     | 63.41(15)  | N(2)#1-Tb(1)-N(1)   | 63.41(15)  | N(2)#2-Tb(1)-N(1)   | 63.41(15)  |
| O(2)#1-Tb(1)-N(5)#1 | 25.4(2)    | O(2)#2-Tb(1)-N(5)#1 | 69.1(2)    | O(2)-Tb(1)-N(5)#1   | 94.1(2)    |
| O(1)-Tb(1)-N(5)#1   | 94.2(2)    | O(1)#1-Tb(1)-N(5)#1 | 26.3(2)    | O(1)#2-Tb(1)-N(5)#1 | 120.6(2)   |
| N(2)-Tb(1)-N(5)#1   | 165.8(2)   | N(2)#1-Tb(1)-N(5)#1 | 72.6(2)    | N(2)#2-Tb(1)-N(5)#1 | 92.4(2)    |
| N(1)-Tb(1)-N(5)#1   | 122.04(16) | O(2)#1-Tb(1)-N(5)#2 | 94.1(2)    | O(2)#2-Tb(1)-N(5)#2 | 25.4(2)    |
| O(2)-Tb(1)-N(5)#2   | 69.1(2)    | O(1)-Tb(1)-N(5)#2   | 120.6(2)   | O(1)#1-Tb(1)-N(5)#2 | 94.2(2)    |

|                      |            |                      |            |                       |            |
|----------------------|------------|----------------------|------------|-----------------------|------------|
| O(1)#2-Tb(1)-N(5)#2  | 26.3(2)    | N(2)-Tb(1)-N(5)#2    | 92.4(2)    | N(2)#1-Tb(1)-N(5)#2   | 165.8(2)   |
| N(2)#2-Tb(1)-N(5)#2  | 72.6(2)    | N(1)-Tb(1)-N(5)#2    | 122.04(16) | N(5)#1-Tb(1)-N(5)#2   | 94.5(2)    |
| O(1W)-Tb(2)-O(1W)#3  | 91.4(6)    | O(1W)-Tb(2)-O(1W)#4  | 91.4(6)    | O(1W)#3-Tb(2)-O(1W)#4 | 91.4(6)    |
| O(1W)-Tb(2)-O(4)#4   | 83.4(4)    | O(1W)#3-Tb(2)-O(4)#4 | 145.3(4)   | O(1W)#4-Tb(2)-O(4)#4  | 122.9(4)   |
| O(1W)-Tb(2)-O(4)     | 122.9(4)   | O(1W)#3-Tb(2)-O(4)   | 83.4(4)    | O(1W)-Tb(2)-O(4)#3    | 145.3(4)   |
| O(1W)#4-Tb(2)-O(4)   | 145.3(4)   | O(4)#4-Tb(2)-O(4)    | 71.2(3)    | O(1W)#3-Tb(2)-O(4)#3  | 122.9(4)   |
| O(1W)#4-Tb(2)-O(4)#3 | 83.4(4)    | O(4)#4-Tb(2)-O(4)#3  | 71.2(3)    | O(4)-Tb(2)-O(4)#3     | 71.2(3)    |
| O(1W)-Tb(2)-O(5)     | 72.1(4)    | O(1W)#3-Tb(2)-O(5)   | 74.1(4)    | O(1W)#4-Tb(2)-O(5)    | 157.4(4)   |
| O(4)#4-Tb(2)-O(5)    | 71.7(3)    | O(4)-Tb(2)-O(5)      | 51.7(3)    | O(4)#3-Tb(2)-O(5)     | 119.0(3)   |
| O(1W)-Tb(2)-O(5)#4   | 74.1(4)    | O(1W)#3-Tb(2)-O(5)#4 | 157.4(5)   | O(1W)#4-Tb(2)-O(5)#4  | 72.1(4)    |
| O(4)#4-Tb(2)-O(5)#4  | 51.7(3)    | O(4)-Tb(2)-O(5)#4    | 119.0(3)   | O(4)#3-Tb(2)-O(5)#4   | 71.7(3)    |
| O(5)-Tb(2)-O(5)#4    | 116.00(13) | O(1W)-Tb(2)-O(5)#3   | 157.4(4)   | O(1W)#3-Tb(2)-O(5)#3  | 72.1(4)    |
| O(1W)#4-Tb(2)-O(5)#3 | 74.1(4)    | O(4)#4-Tb(2)-O(5)#3  | 119.0(3)   | O(4)-Tb(2)-O(5)#3     | 71.7(3)    |
| O(4)#3-Tb(2)-O(5)#3  | 51.7(3)    | O(5)-Tb(2)-O(5)#3    | 116.00(13) | O(5)#4-Tb(2)-O(5)#3   | 116.00(13) |
| O(1W)-Tb(2)-N(6)     | 97.0(4)    | O(1W)#3-Tb(2)-N(6)   | 78.6(4)    | O(1W)#4-Tb(2)-N(6)    | 167.0(4)   |
| O(4)#4-Tb(2)-N(6)    | 68.2(3)    | O(4)-Tb(2)-N(6)      | 26.2(3)    | O(4)#3-Tb(2)-N(6)     | 95.1(3)    |
| O(5)-Tb(2)-N(6)      | 25.6(3)    | O(5)#4-Tb(2)-N(6)    | 119.7(3)   | O(5)#3-Tb(2)-N(6)     | 94.8(3)    |
| O(1W)-Tb(2)-N(6)#4   | 78.6(4)    | O(1W)#3-Tb(2)-N(6)#4 | 167.0(4)   | O(1W)#4-Tb(2)-N(6)#4  | 97.0(4)    |
| O(4)#4-Tb(2)-N(6)#4  | 26.2(3)    | O(4)-Tb(2)-N(6)#4    | 95.1(3)    | O(4)#3-Tb(2)-N(6)#4   | 68.2(3)    |
| O(5)-Tb(2)-N(6)#4    | 94.8(3)    | O(5)#4-Tb(2)-N(6)#4  | 25.6(3)    | O(5)#3-Tb(2)-N(6)#4   | 119.7(3)   |
| N(6)-Tb(2)-N(6)#4    | 94.3(3)    | O(1W)-Tb(2)-N(6)#3   | 167.0(4)   | O(1W)#3-Tb(2)-N(6)#3  | 97.0(4)    |
| O(1W)#4-Tb(2)-N(6)#3 | 78.6(4)    | O(4)#4-Tb(2)-N(6)#3  | 95.1(3)    | O(4)-Tb(2)-N(6)#3     | 68.2(3)    |
| O(4)#3-Tb(2)-N(6)#3  | 26.2(3)    | O(5)-Tb(2)-N(6)#3    | 119.7(3)   | O(5)#4-Tb(2)-N(6)#3   | 94.8(3)    |
| O(5)#3-Tb(2)-N(6)#3  | 25.6(3)    | N(6)-Tb(2)-N(6)#3    | 94.3(3)    | N(6)#4-Tb(2)-N(6)#3   | 94.3(3)    |

<sup>a</sup> Symmetry code for: **4**: #1 -y+1,x-y,z, #2 -x+y+1,-x+1,z, #3 y,x,z-1/2, #4 -x+y,-x,z, #5 -y,x-y,z; **5**: #1 -y+2,x-y+1,z, #2 -x+y+1,-x+2,z, #3 -y+2,x-y,z, #4 -x+y+2,-x+2,z; **6**: #1 -y,x-y,z, #2 -x+y,-x,z, #3 -y+1,x-y+1,z, #4 -x+y,-x+1,z
